# Supplementary material for: Process-induced cell wall permeability modulates the in vitro starch digestion kinetics of common bean cotyledon cells
Source: Royal Society of Chemistry journal article supplement (doi:10.1039/c8fo01619d), 2018-01-01
Supplement: c8fo01619d1.pdf [file c8fo01619d1.pdf]

## Electronic Supplementary Information

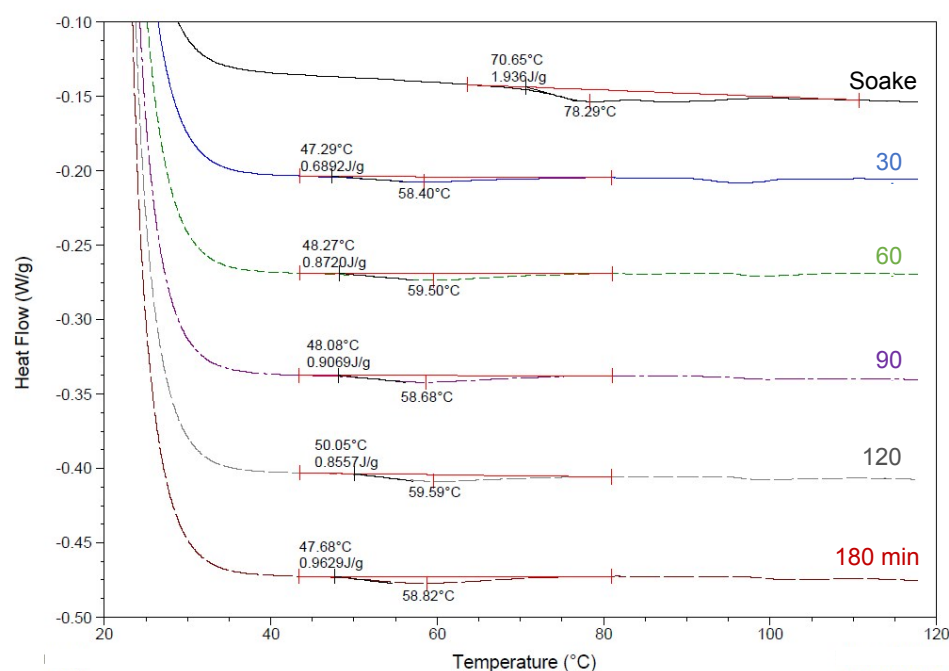

**Figure S1.** Representative DSC thermograms of cotyledon cells isolated from common beans subjected to thermal treatments (95°C) of different intensities (times). A representative DSC thermogram of soaked common beans (*i.e.*, sample to which no thermal processing was applied), exhibiting the peak corresponding to residual gelatinisation enthalpy ( $T_p = 78^\circ\text{C}$ ), is shown for comparison purposes. As can be observed in the graph, the residual gelatinisation enthalpy of all samples under study was negligible (*i.e.*, the peak corresponding to this thermal event was not identified during calorimetric analysis).
